# Supplementary material for: High-capacity functional protein encapsulation in nanoengineered polypeptide microcapsules
Source: Royal Society of Chemistry journal article supplement (doi:10.1039/b511353a), 2005-11-16
Supplement: b511353a.pdf [file b511353a.pdf]

**Zhi & Haynie**

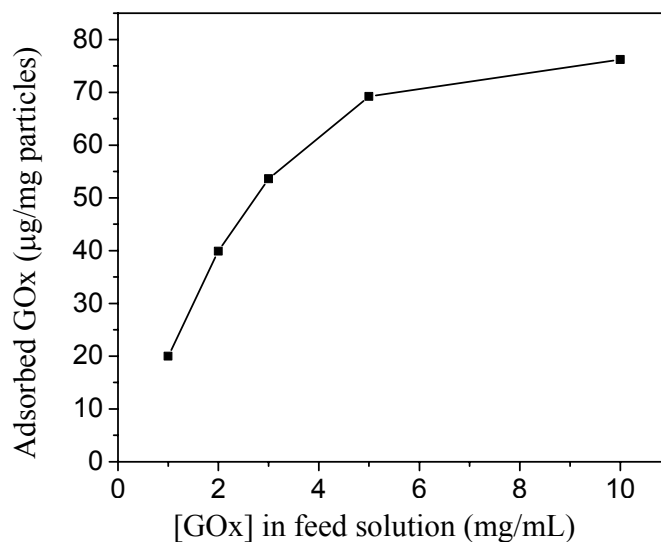

GOx adsorption by  $\text{CaCO}_3$  microparticle templates. Protein adsorption was quantified by decrease in absorbance at 280 nm using a Jasco V-430 spectrophotometer (Japan). GOx-loaded microparticles were separated from the GOx adsorption solution by centrifugation. The maximum amount of GOx loaded was about 76  $\mu\text{g}/\text{mg}$  particles. This translates into approximately  $9.4 \times 10^{-12}$  g of enzyme per particle, assuming a capsule volume =  $4.6 \times 10^{-11}$   $\text{cm}^3$ . Not all initially adsorbed GOx was present in capsules, however, as multiple washing steps, sequential adsorption of polypeptide, and dissolution of the core resulted in some loss of enzyme to solution.
